# Supplementary material for: Synthesis of Mg@Mg17Al12 ultrafine particles with superior hydrogen storage properties by hydrogen plasma–metal reaction
Source: Royal Society of Chemistry journal article supplement (doi:10.1039/c2jm33911k), 2012-01-01

## Synthesis of Mg@Mg<sub>17</sub>Al<sub>12</sub> ultrafine particles with superior hydrogen storage properties by hydrogen plasma-metal reaction

**Fig. S1** High resolution TEM images of the as-prepared Mg-Al UFPs: (a) Mg-7 at.% Al, (b) Mg-22 at.% Al and (c) Mg-27 at.% Al. It can be seen apparently in Fig. S1 that these Mg-Al UFPs possess the core/shell structure.

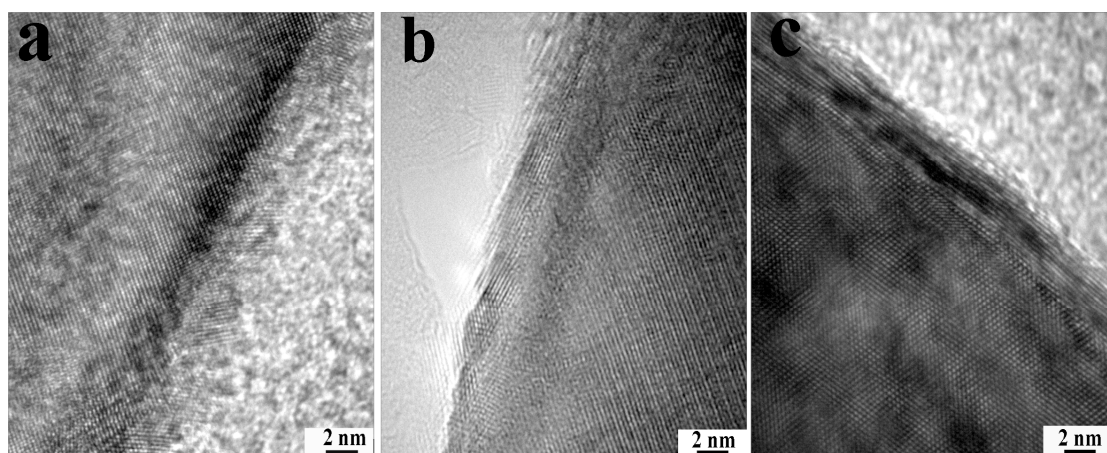

**Fig. S2** Plots  $\ln[-\ln(1-\alpha)]$  vs.  $\ln(t)$  for hydrogen absorption (a) and desorption (b) of Mg-7 at.% Al UFPs. Fig. S2 (a) and (b) detail how to obtain the rate constants  $k$  of both hydrogen absorption and desorption.

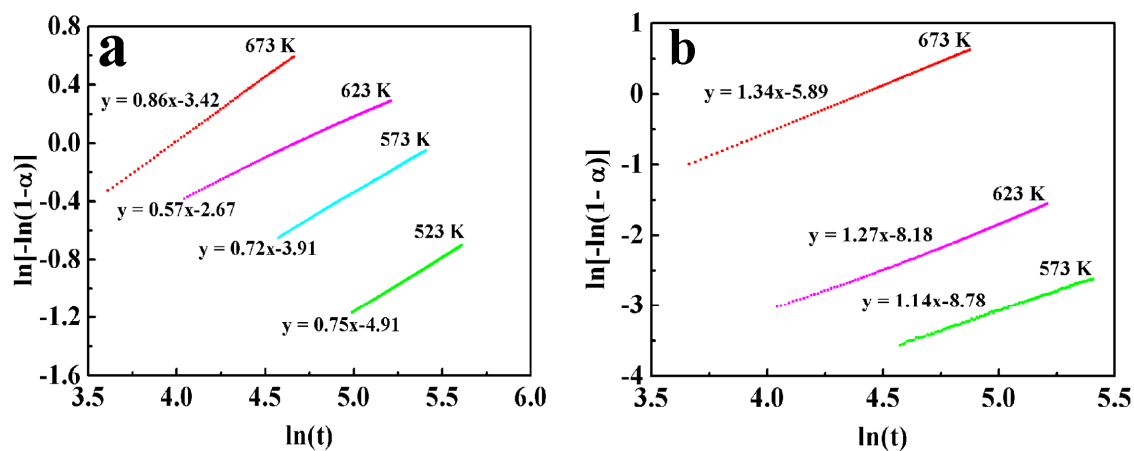

Supplement: c2jm33911k.pdf [file c2jm33911k.pdf]
